# Supplementary material for: A New Quinazolinone Alkaloid from Rhodiola tibetica Endophytic Fungus Penicillium sp. HJT-A-6
Source: Preprints.org preprint supplement (doi:10.20944/preprints202404.1012.v1), 2024-04-16
Supplement: Supplementary file 1 [file supplementary]

# A New Quinazolinone Alkaloid from *Rhodiola tibetica* endophytic fungus *Penicillium* sp. HJT-A-6

Dongliang Xiao <sup>1,†</sup>, Yan Wang <sup>1,†</sup>, Congcong Gao <sup>1</sup>, Xuemei Zhang <sup>1</sup>, Weixing Feng <sup>1</sup>, Xuan Lu <sup>1,\*</sup>,  
Baomin Feng <sup>1,\*</sup>

<sup>1</sup> College of life and health, Dalian University, Dalian 116622, China; xdl120318@163.com (D.X.);  
WangYan\_9910@163.com (Y.W.); gcc1125@163.com (C.G.); 2472103706@qq.com (X.Z.); fwx\_0910@163.com  
(W.F.);

\* Correspondence: luxuan\_232@163.com (X.L.); fbmdlu@163.com (B.F.)

<sup>†</sup> These authors contributed equally to this work.

## Supplementary Materials

### Table of Contents

|                                                                                                        |           |
|--------------------------------------------------------------------------------------------------------|-----------|
| <b>Figure S1.</b> Positive mode HRESIMS spectrum of <b>1</b>                                           | <b>3</b>  |
| <b>Figure S2.</b> UV spectrum of <b>1</b>                                                              | <b>4</b>  |
| <b>Figure S3.</b> $^1\text{H}$ NMR ( $\text{DMSO-}d_6$ , 500 MHz) spectrum of <b>1</b>                 | <b>5</b>  |
| <b>Figure S4.</b> $^1\text{H}$ NMR ( $\text{DMSO-}d_6$ , 500 MHz) spectrum of <b>1a</b>                | <b>6</b>  |
| <b>Figure S5.</b> $^1\text{H}$ NMR ( $\text{DMSO-}d_6$ , 500 MHz) spectrum of <b>1b</b>                | <b>7</b>  |
| <b>Figure S6.</b> $^{13}\text{C}$ NMR ( $\text{DMSO-}d_6$ , 125 MHz) spectrum of <b>1</b>              | <b>8</b>  |
| <b>Figure S7.</b> HSQC ( $\text{DMSO-}d_6$ , 500 MHz) spectrum of <b>1</b>                             | <b>9</b>  |
| <b>Figure S8.</b> HMBC ( $\text{DMSO-}d_6$ , 500 MHz) spectrum of <b>1</b>                             | <b>10</b> |
| <b>Figure S9.</b> $^1\text{H}$ - $^1\text{H}$ COSY ( $\text{DMSO-}d_6$ , 500 MHz) spectrum of <b>1</b> | <b>11</b> |
| <b>Figure S10.</b> NOESY ( $\text{DMSO-}d_6$ , 500 MHz) spectrum of <b>1</b>                           | <b>12</b> |
| <b>Figure S11.</b> CD spectrum of <b>1</b>                                                             | <b>13</b> |

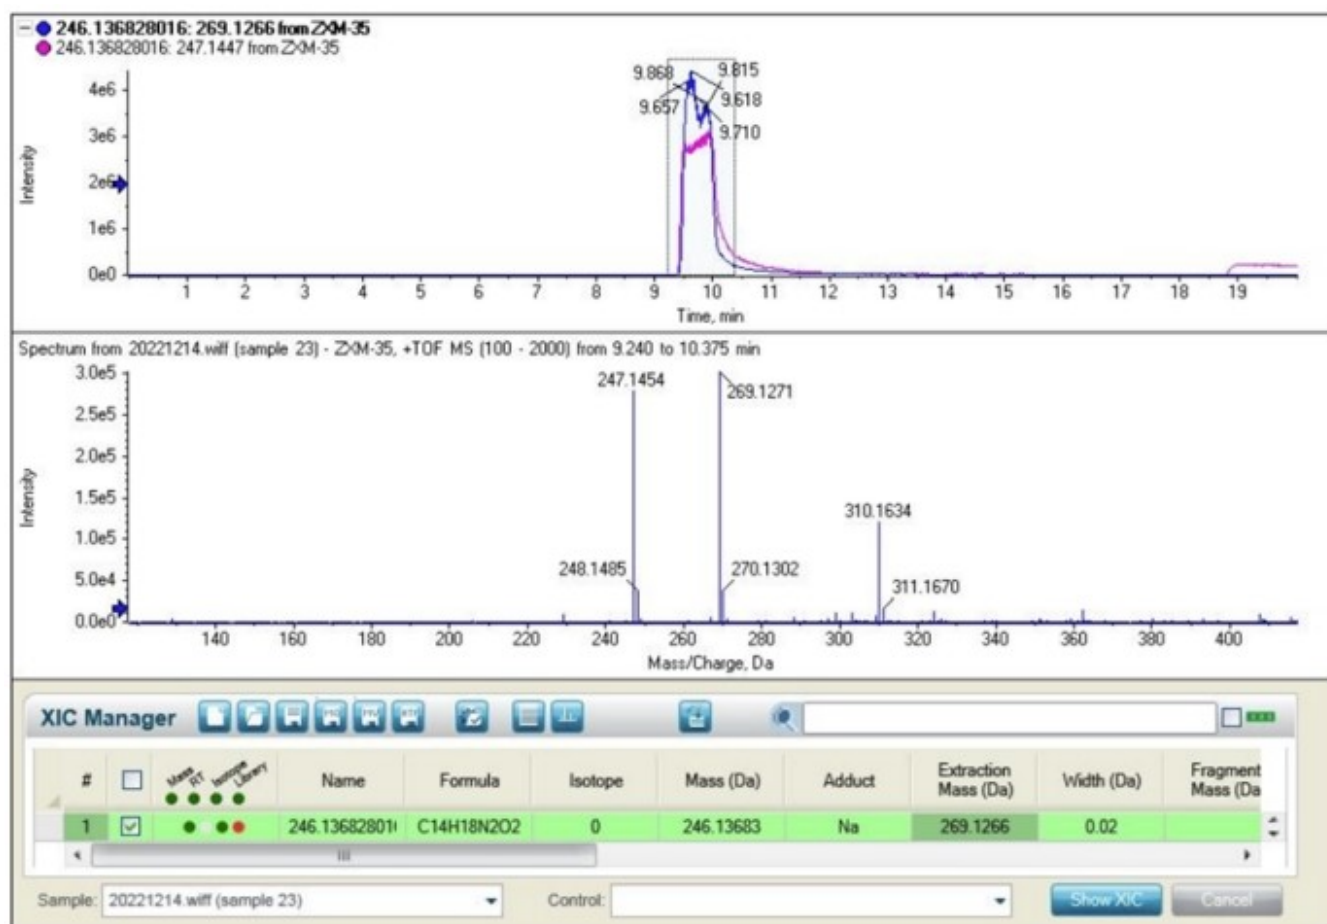

**Figure S1.** Positive mode HRESIMS spectrum of **1**

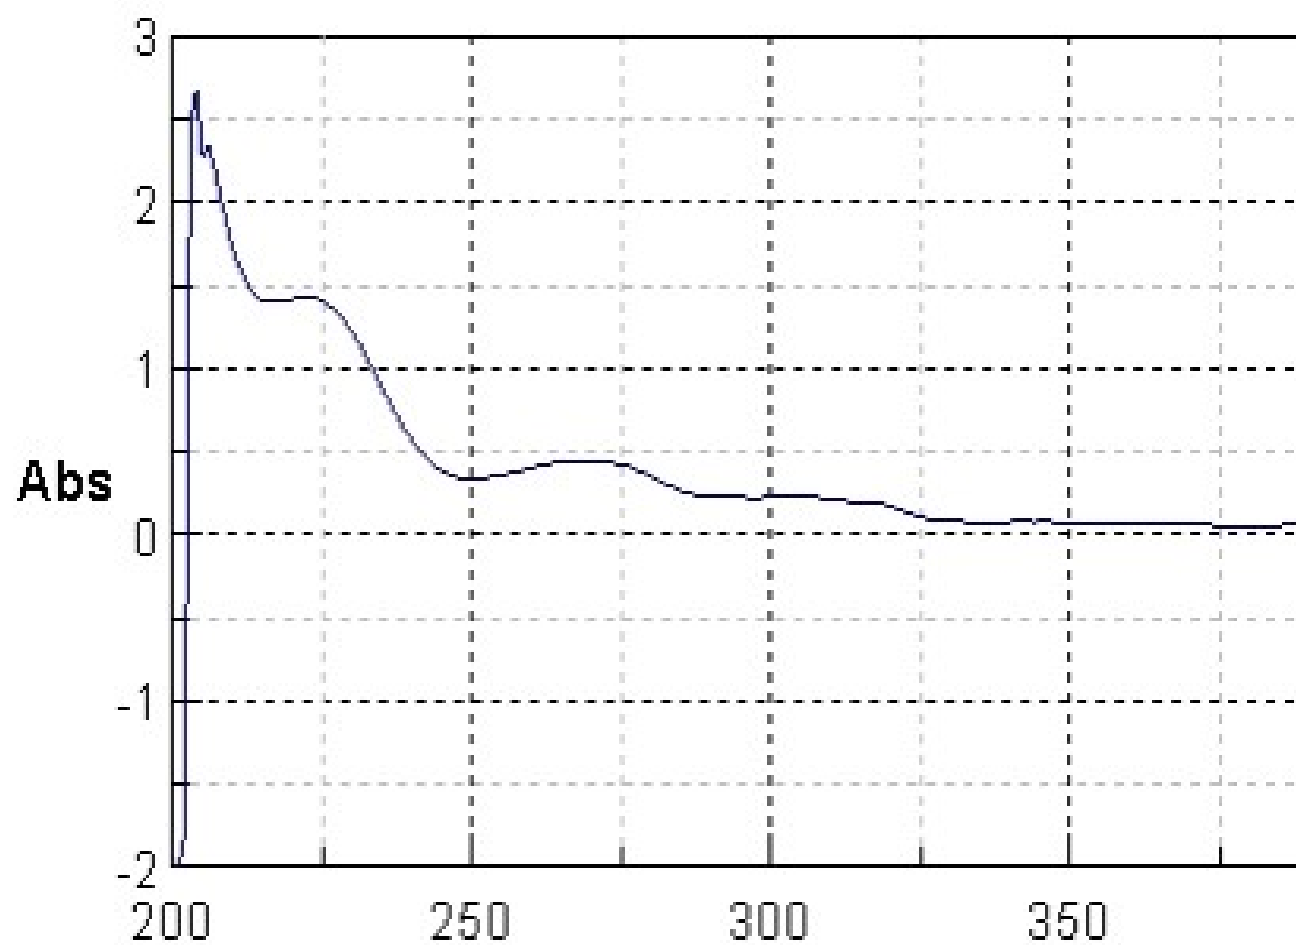

Figure S2. UV spectrum of 1

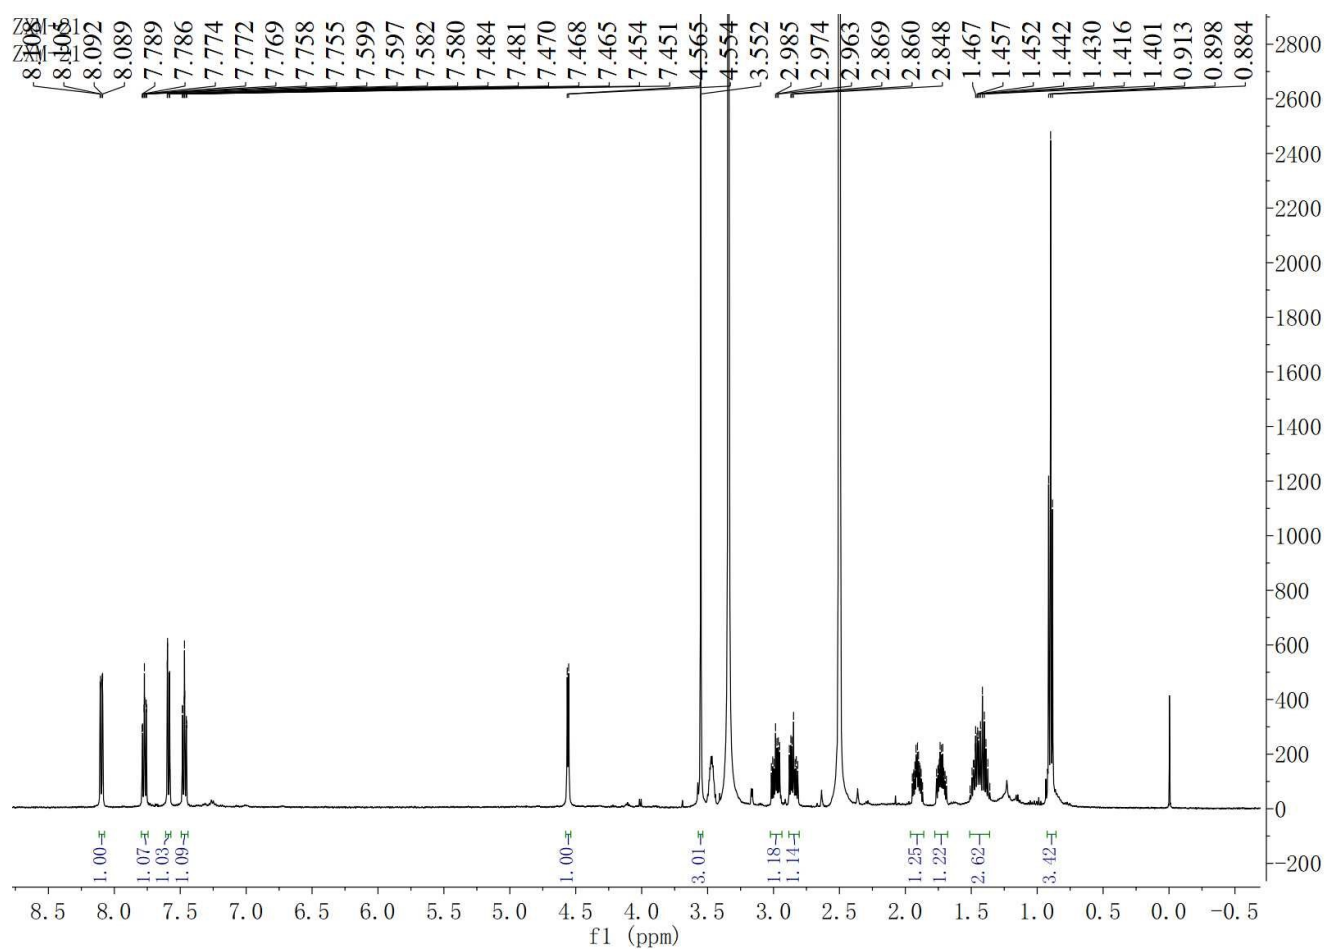

**Figure S3.**  $^1\text{H}$  NMR ( $\text{DMSO}-d_6$ , 500 MHz) spectrum of **1**

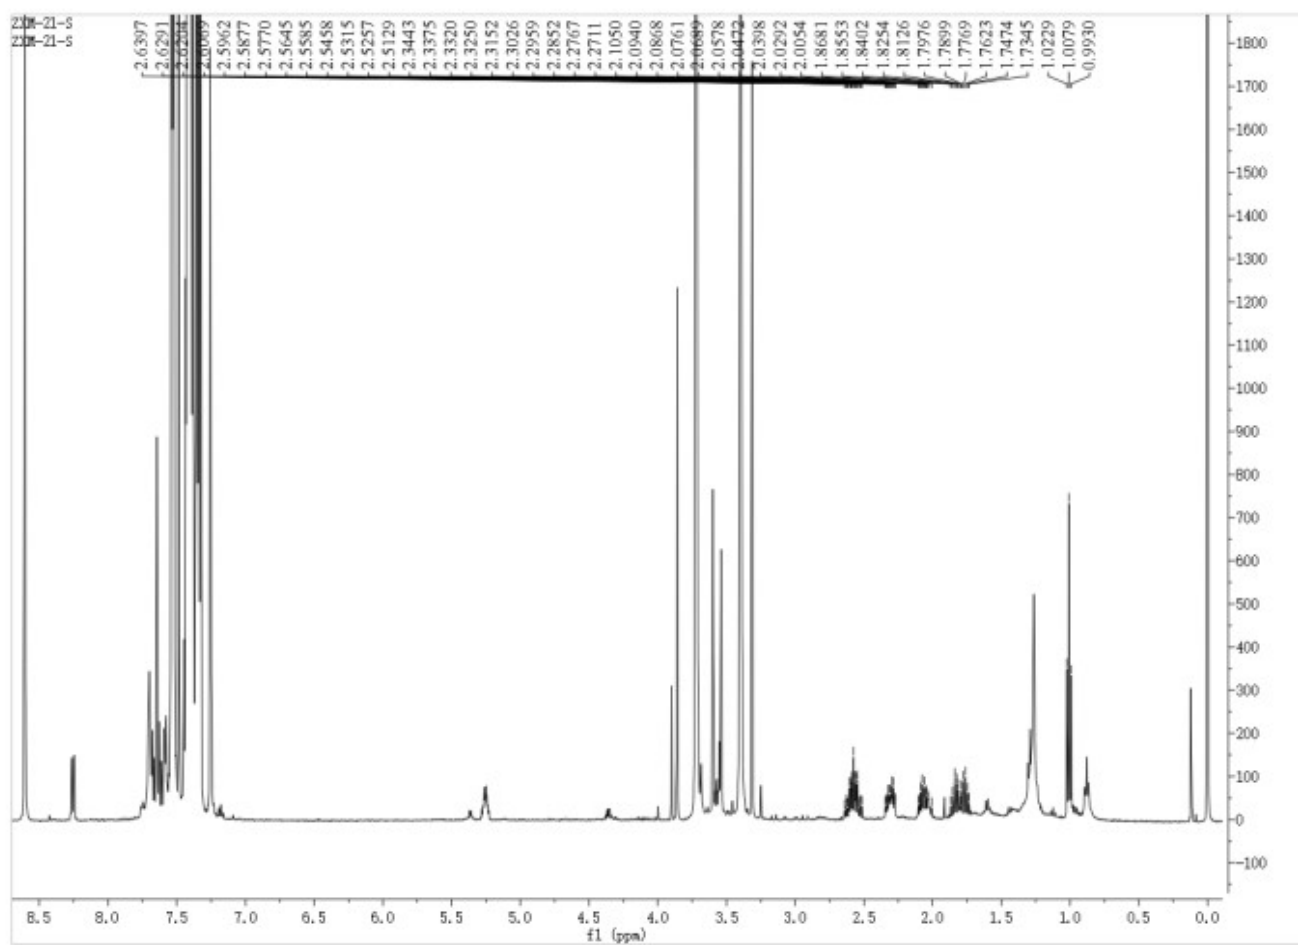

**Figure S4.**  $^1\text{H}$  NMR ( $\text{DMSO}-d_6$ , 500 MHz) spectrum of **1a**

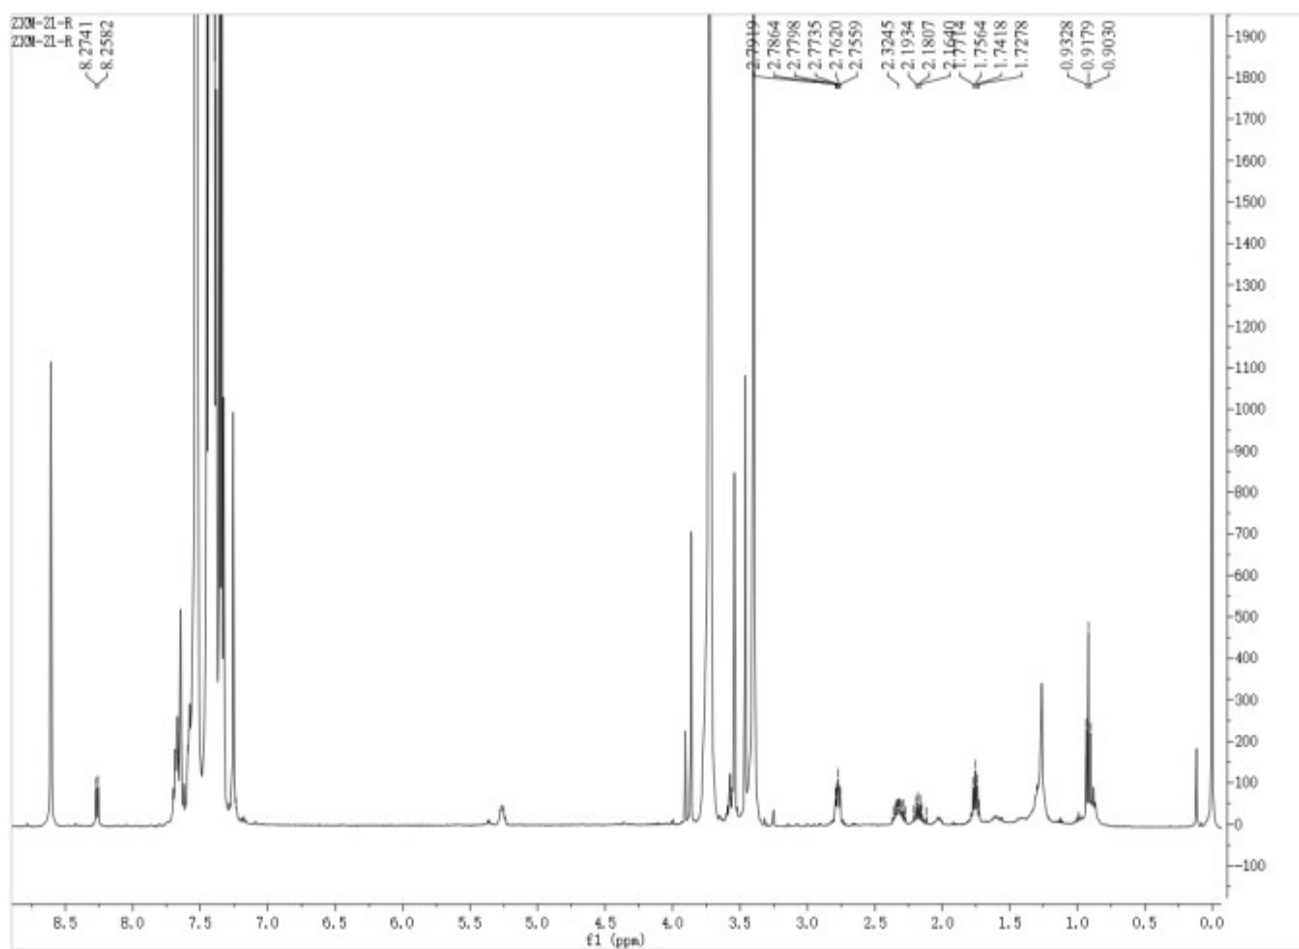

**Figure S5.**  $^1\text{H}$  NMR ( $\text{DMSO-}d_6$ , 500 MHz) spectrum of **1b**

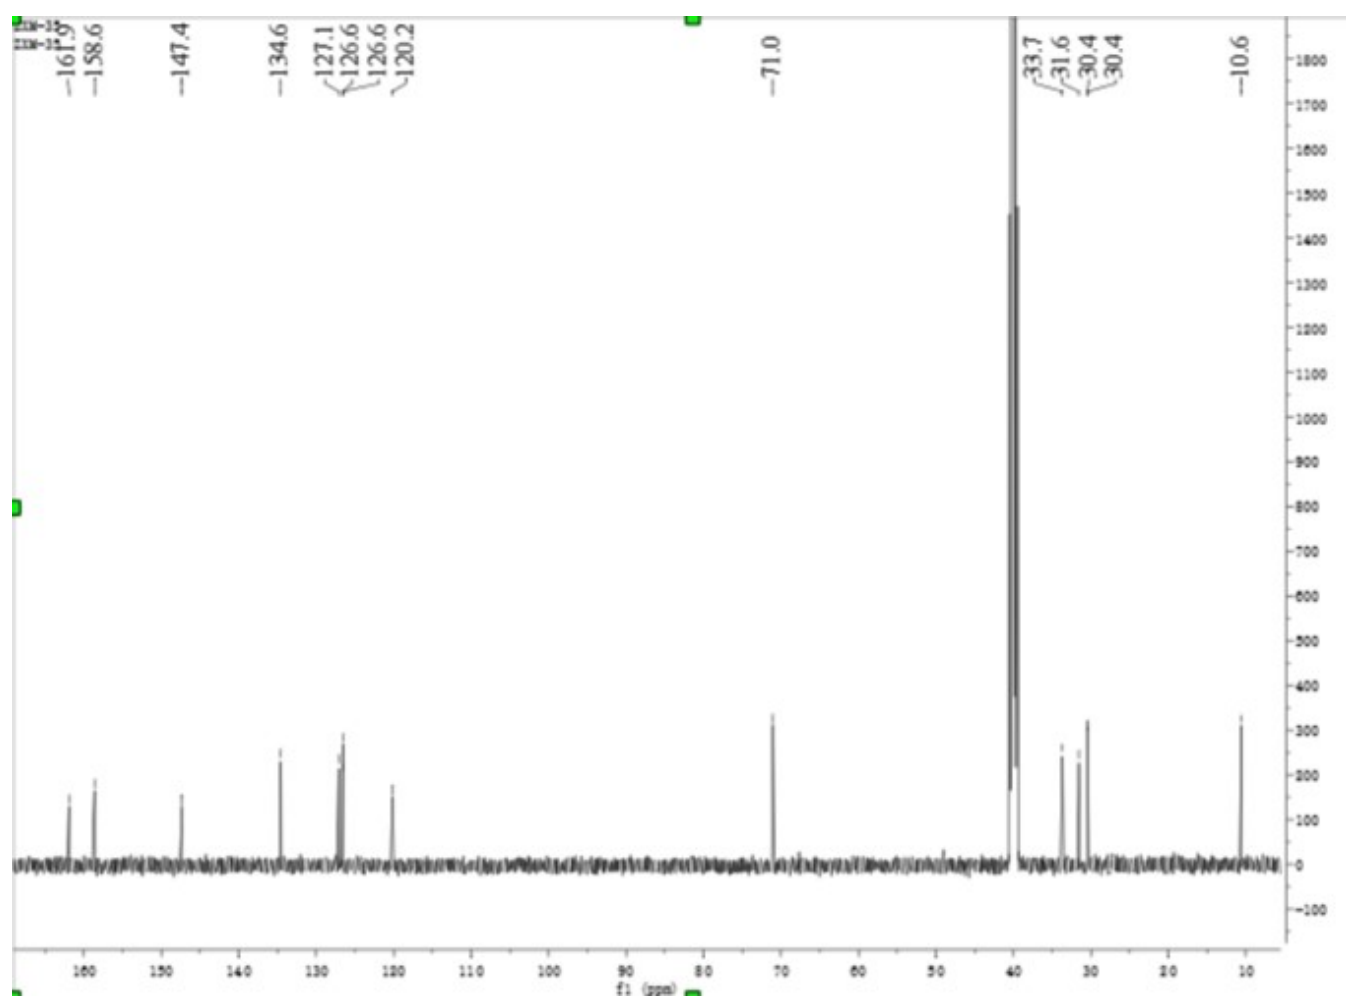

**Figure S6.** <sup>13</sup>C NMR (DMSO-*d*<sub>6</sub>, 125 MHz) spectrum of **1**

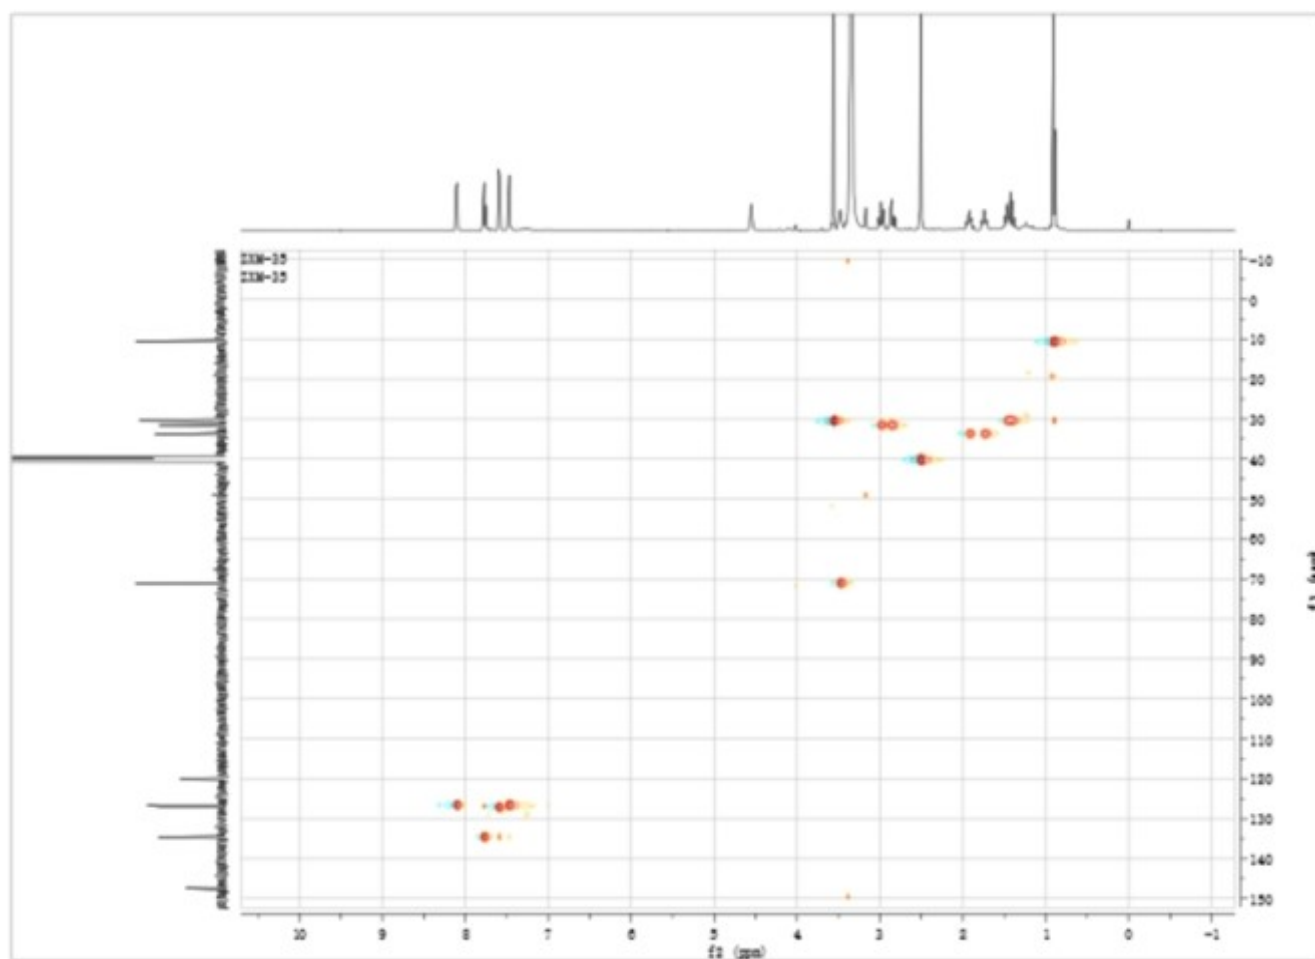

**Figure S7.** HSQC (DMSO- $d_6$ , 500 MHz) spectrum of **1**

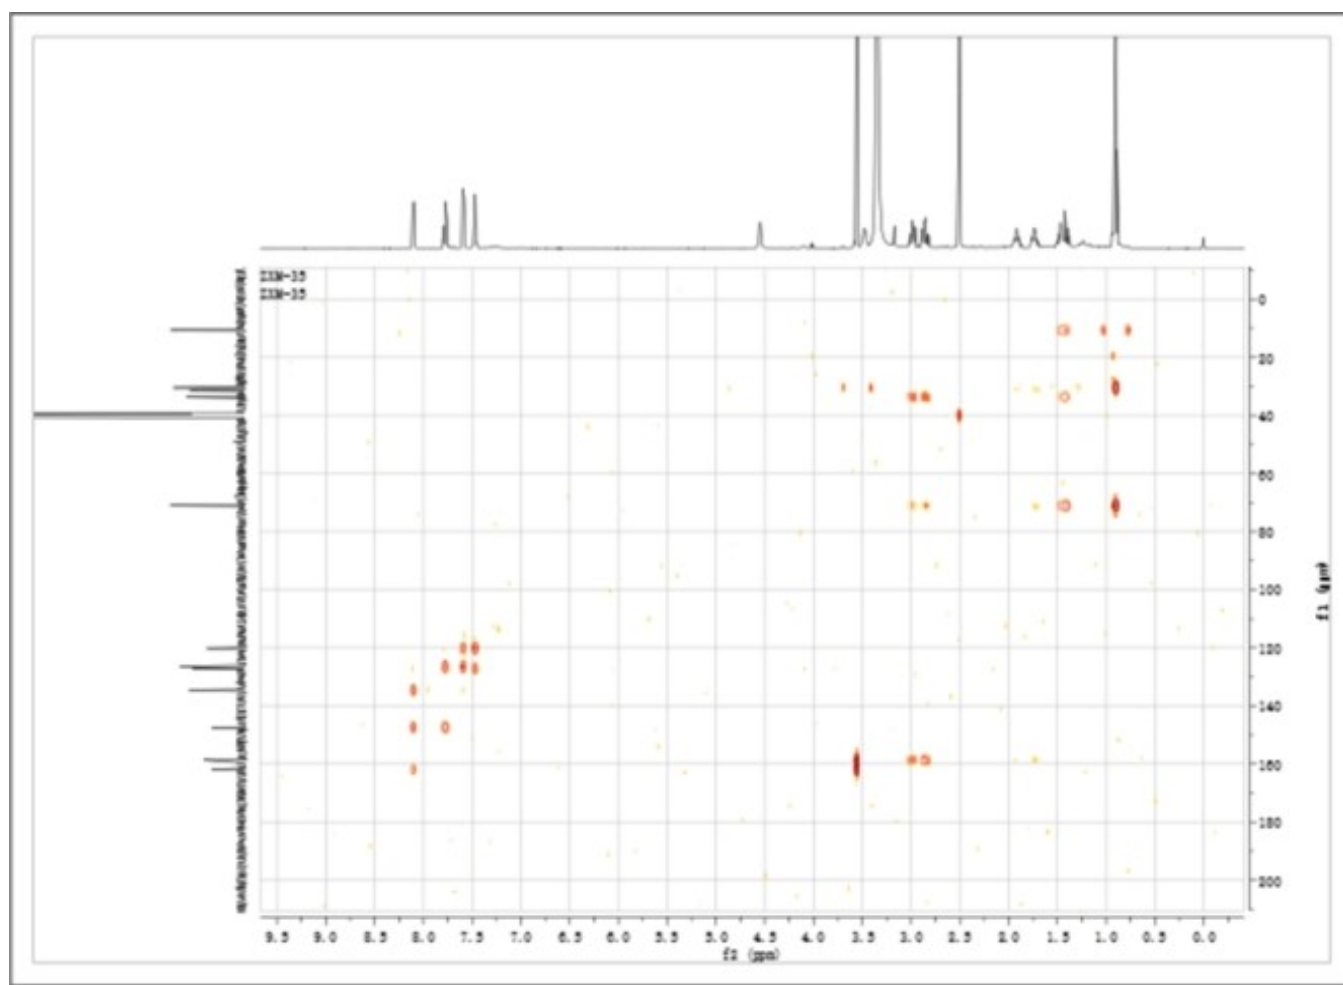

**Figure S8.** HMBC (DMSO-*d*<sub>6</sub>, 500 MHz) spectrum of **1**

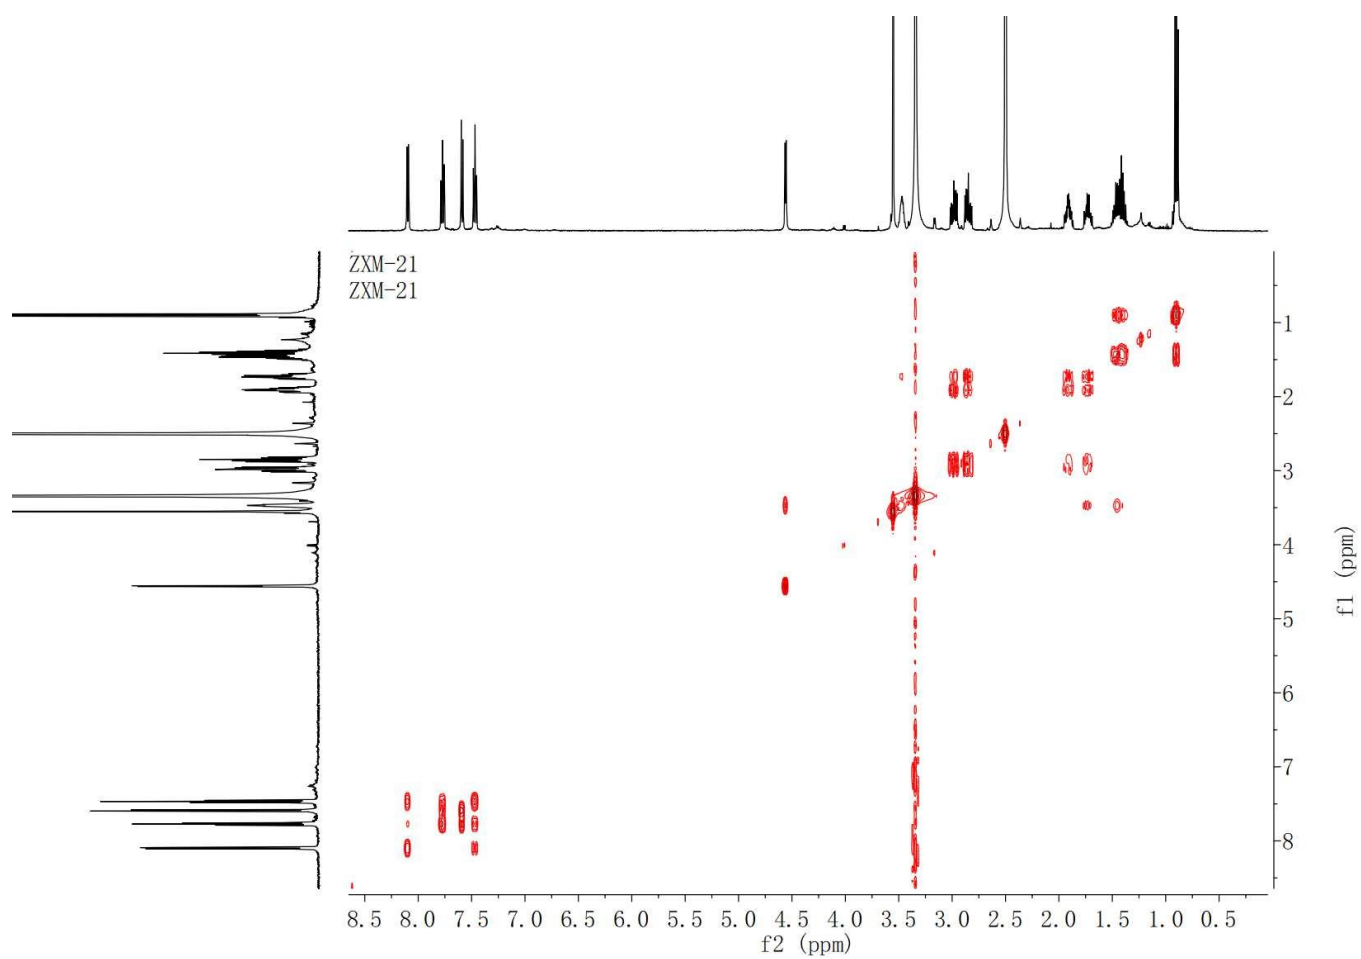

**Figure S9.**  $^1\text{H}$ - $^1\text{H}$  COSY (DMSO- $d_6$ , 500 MHz) spectrum of **1**

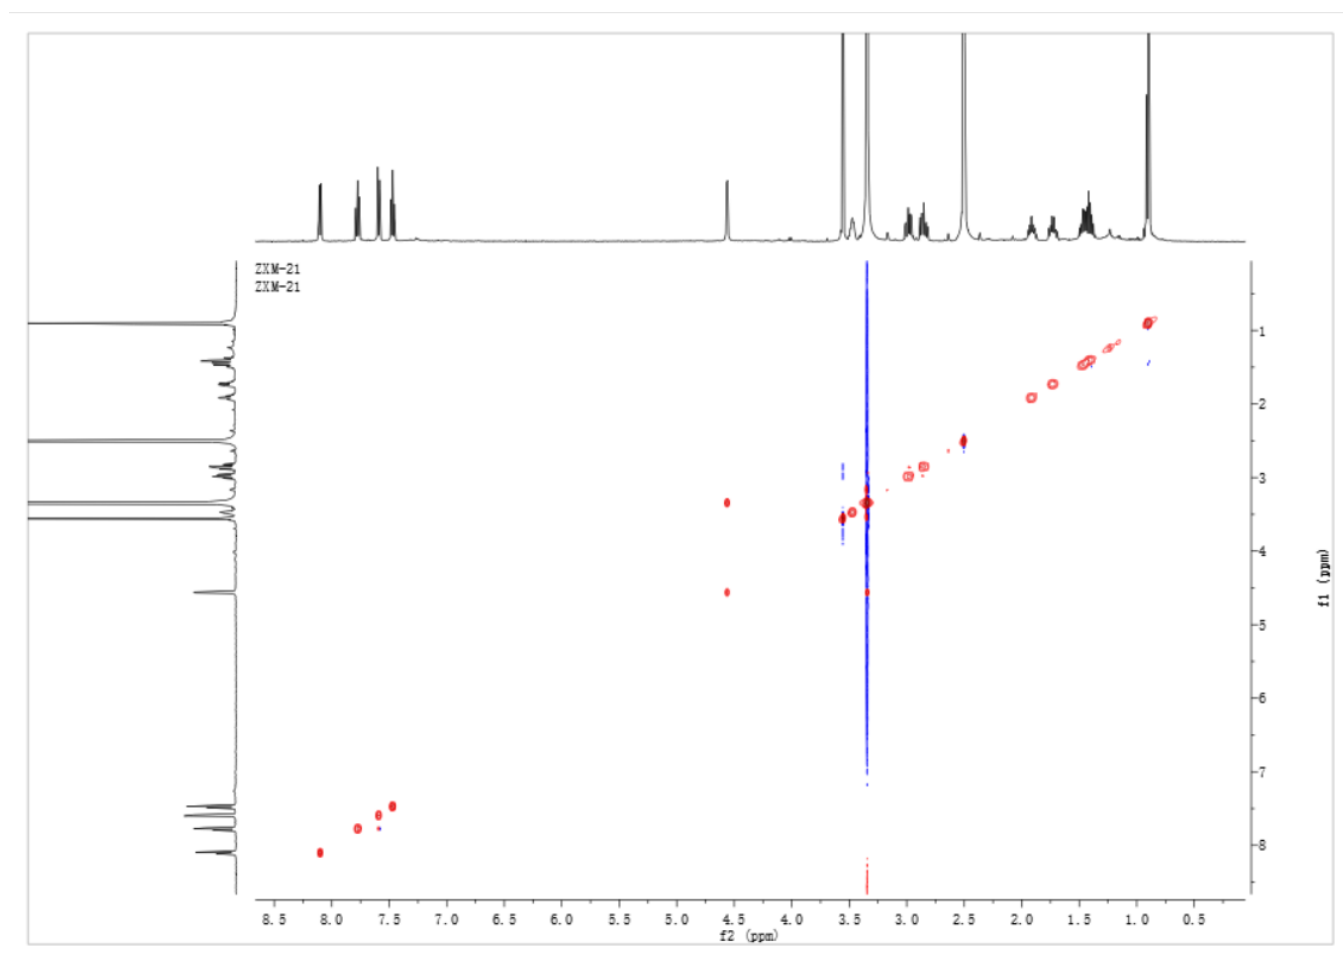

**Figure S10.** NOESY (DMSO-*d*<sub>6</sub>, 500 MHz) spectrum of **1**

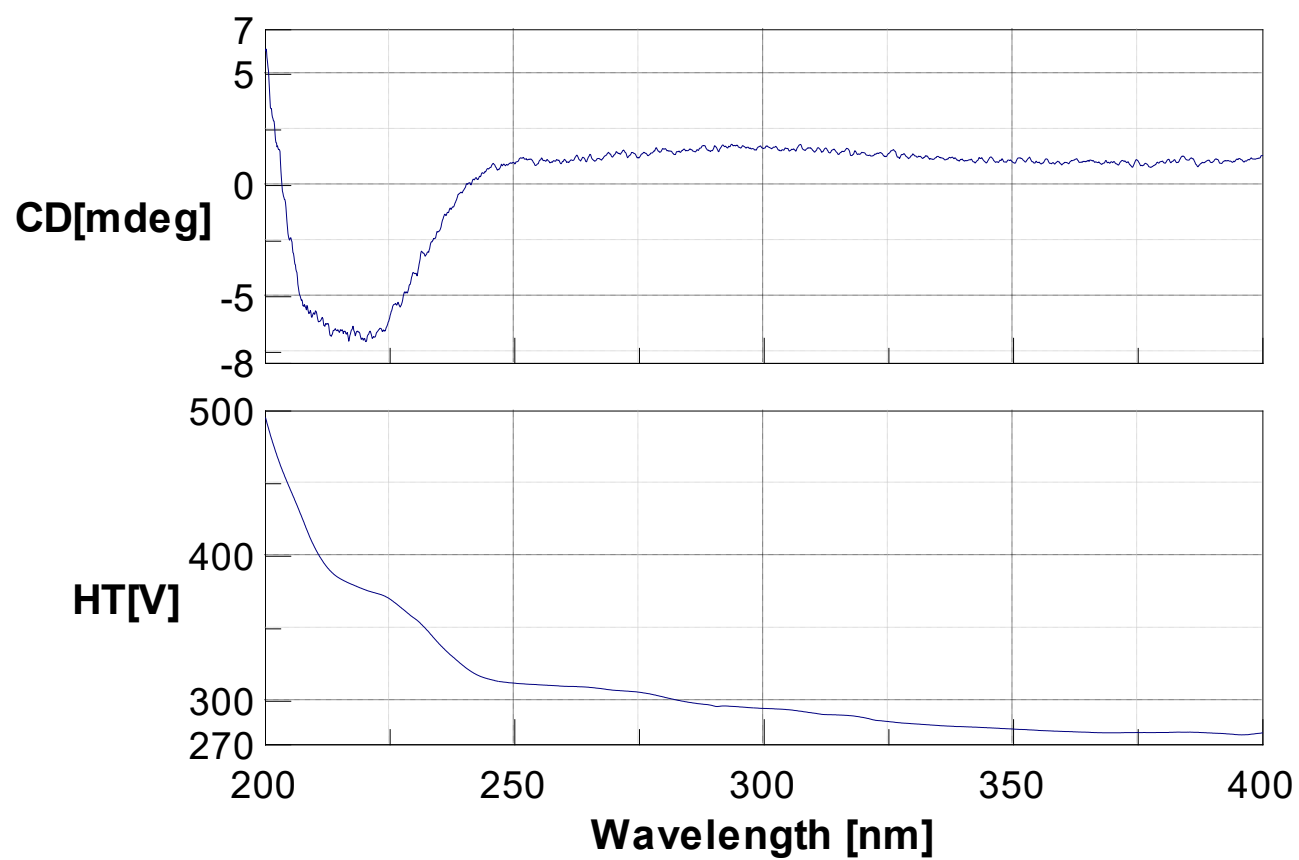

Figure S11. CD spectrum of **1**
